# Supplementary material
Source: publisher figshare collection journal article supplement (https://karger.figshare.com/ndownloader/files/22162839)

**Supplemental figure 2**. Flowchart of study selection.


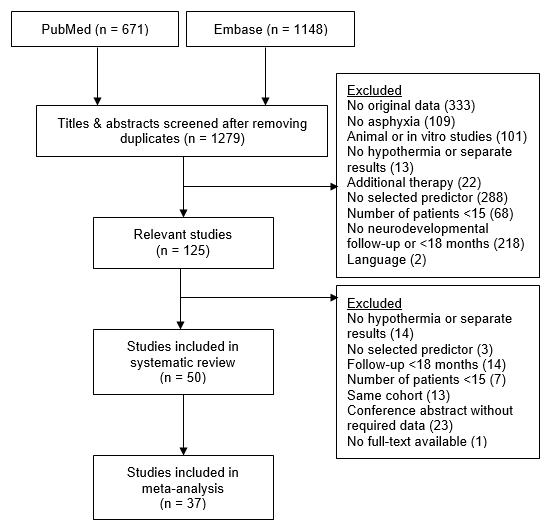

Supplement: Supplementary file 1 [file 22162839]
